# Supplementary material for: Single-molecule imaging reveals modulation of cell wall synthesis dynamics in live bacterial cells
Source: PubMed Central journal article supplement (PMC5078992; doi:10.1038/ncomms13170), 2016-10-24
Supplement: ncomms13170-s1.pdf [file ncomms13170-s1.pdf]

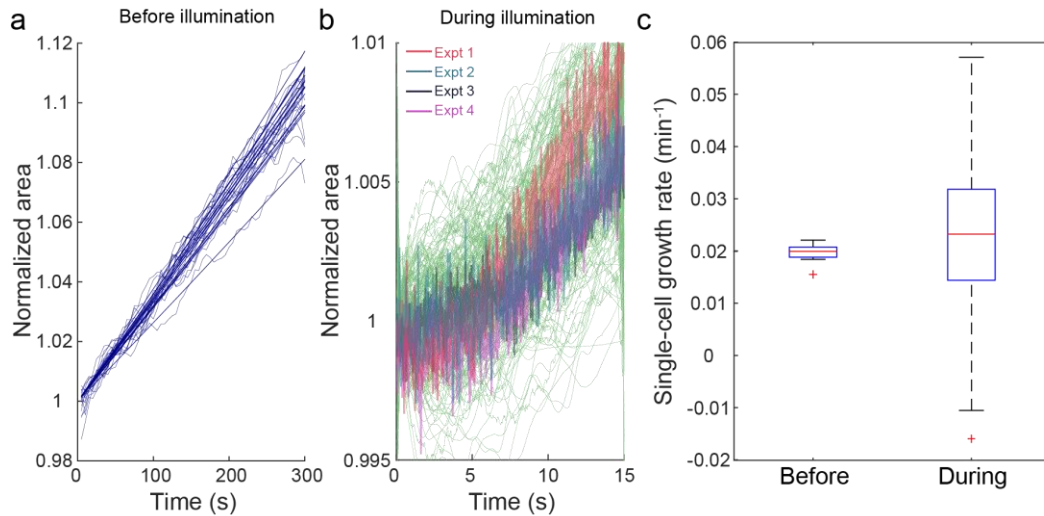

1

2 **Supplementary Figure 1** Single-cell elongation rate, as assayed during sptPALM  
 3 imaging. Mean elongation rate across single cells was evaluated according to an  
 4 exponential fit to the projected cell area increase over time throughout a 5-min  
 5 interval directly before and during a 15-s interval of illumination with the 405-nm  
 6 activation laser.

7 a) Area traces were smoothed over 30-s intervals (10 frames) prior to fitting  
 8 (straight lines). Plotted is the area of each cell normalized to the fitted value  
 9 of the initial area. The mean doubling time is 35 min ( $n = 17$  cells).

10 b) Area traces (thin green curves) were smoothed over 0.3-s intervals (20  
 11 frames) prior to fitting. Thick curves are the average area traces  
 12 (unsmoothed) for the four experiments used to compute the diffusion  
 13 constant for PBP1A in Fig. 1C ( $n = 57-65$  cells in each experiment). Plotted is  
 14 the area of each cell normalized to the fitted value of the initial area. The  
 15 doubling time estimated from the four average area traces was  $37.5 \pm 9.5$  min.

16 c) Box plot of elongation rates for cells in (A) and (B). The elongation rate  
17 during illumination was more noisy due to the short imaging time, but mean  
18 values were similar.

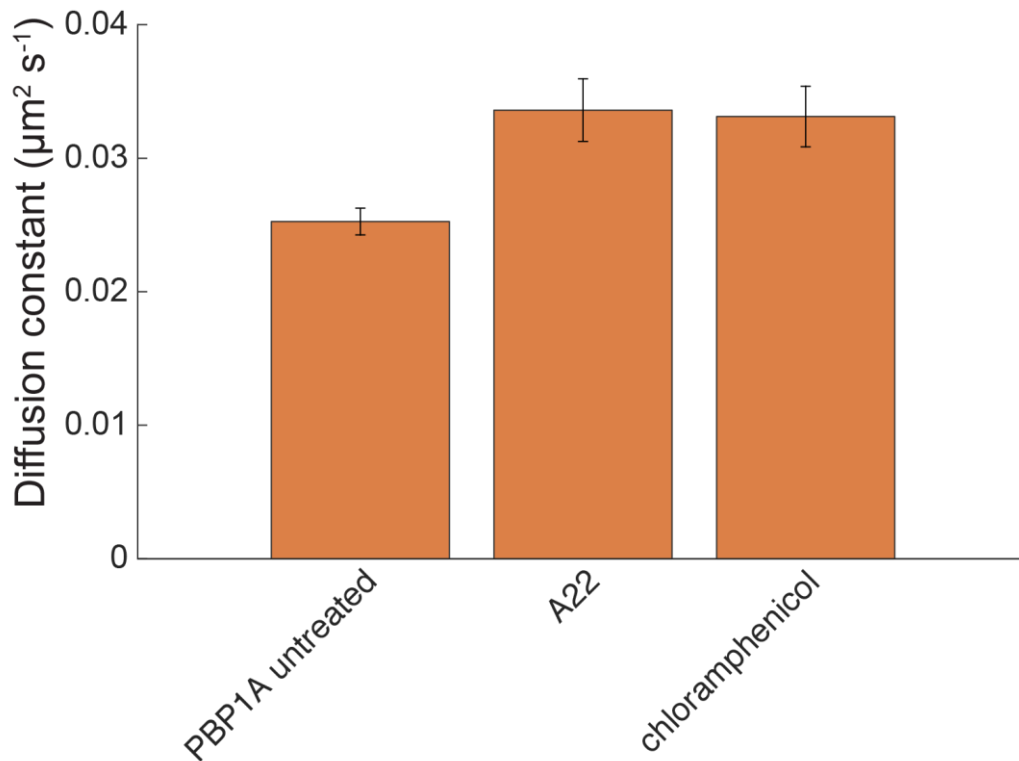

19

20 **Supplementary Figure 2** Apparent diffusion constants of PAmCherry-PBP1A  
21 molecules imaged in TKL130 cells treated with the antibiotics A22 (100  $\mu\text{g}/\text{ml}$ ) or  
22 chloramphenicol (100  $\mu\text{g ml}^{-1}$ ). Error bars indicate the standard deviation of 1000  
23 bootstrap samples.

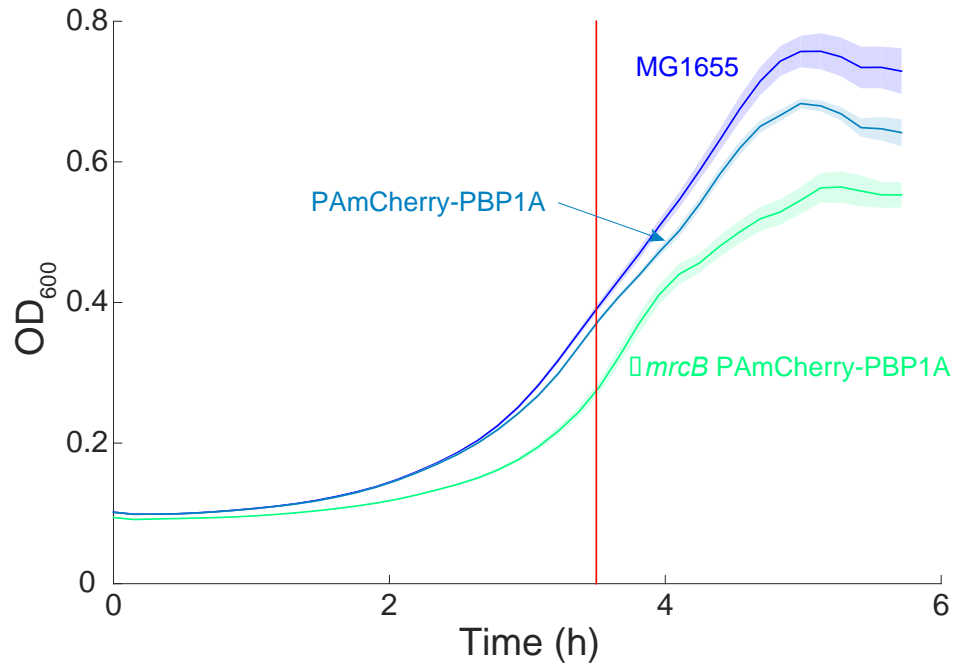

24

25 **Supplementary Figure 3** Growth curves of MG1655, TK241 (PAmCherry-PBP1A,  
26 Table S3), and TK240 ( $\Delta mrcB$  PAmCherry-PBP1A, Table S3) cells measured in a  
27 plate reader. Curves are means ( $n = 3$ ) with the shaded areas representing one  
28 standard deviation above and below the mean. Vertical red line indicates the time  
29 point of sptPALM imaging.

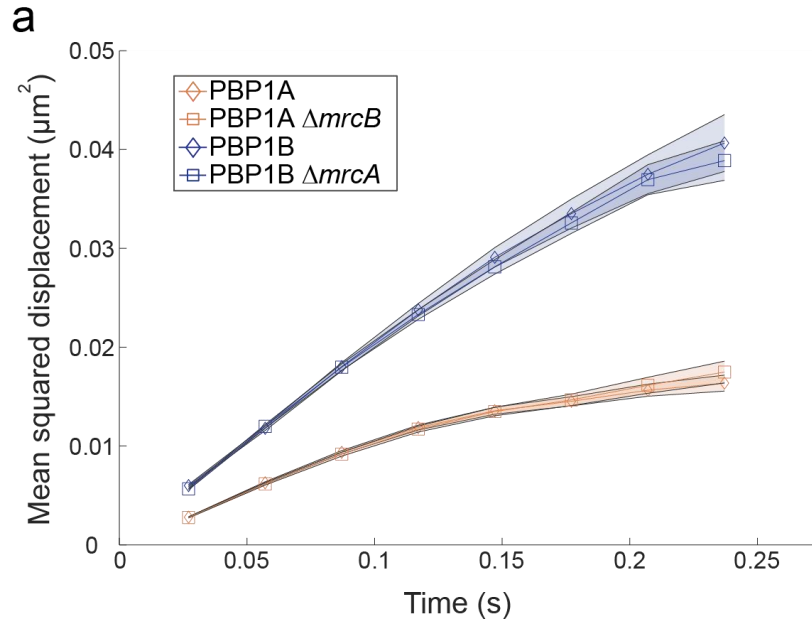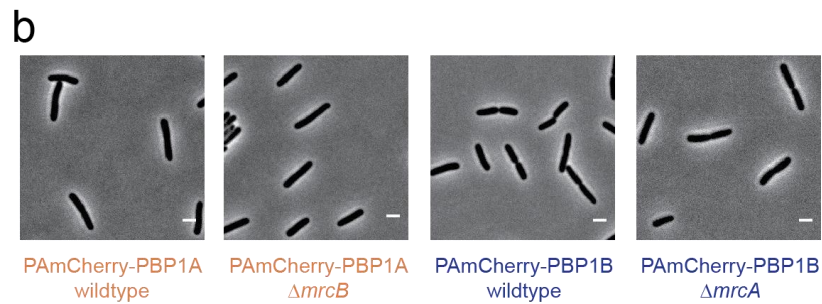

30

31 **Supplementary Figure 4** PBP1A and PBP1B dynamics do not depend on the  
 32 presence of the other protein. **(a)** Mean squared displacement of PAmCherry-PBP1A  
 33 in wild-type ( $n = 3177$  molecules, TKL241) and  $\Delta mrcB$  (lacking PBP1b;  $n = 1994$   
 34 molecules, TKL240) backgrounds and PAmCherry-PBP1B in wild-type ( $n = 898$   
 35 molecules, TKL211) and  $\Delta mrcA$  (lacking PBP1a;  $n = 1491$  molecules, TKL239)  
 36 backgrounds. These data are also represented in Figure 1c of the main text. Shaded  
 37 areas represent the standard error of the mean for a given time point. **(b)** Phase-  
 38 contrast images of the strains used for single-molecule imaging. Scale bar: 2  $\mu\text{m}$ .

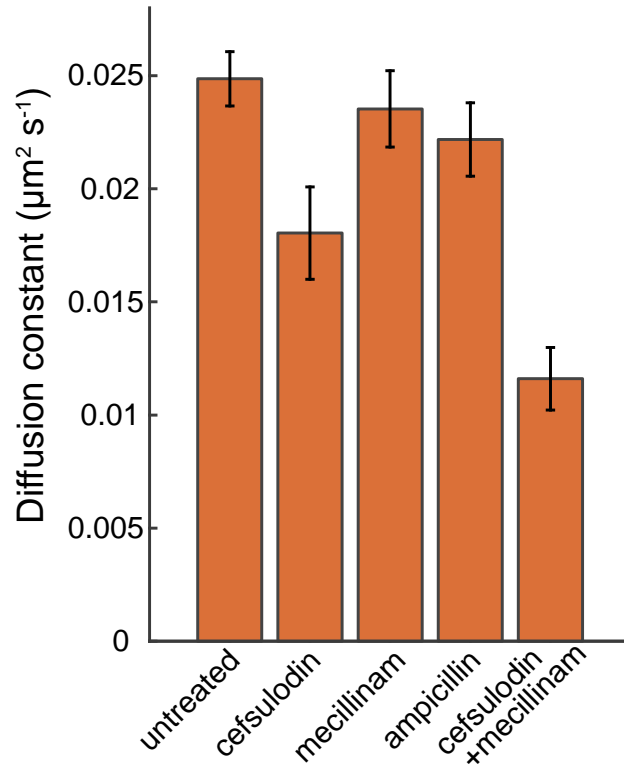

39

40 **Supplementary Figure 5** The effect of antibiotics on PBP1A dynamics is not  
41 disrupted by the absence of PBP1B. Apparent diffusion constants of PAMCherry-  
42 PBP1A molecules in a  $\Delta mrcB$  background (TKL240) imaged on agarose pads  
43 containing  $\beta$ -lactam antibiotics ( $100 \mu\text{g ml}^{-1}$  each). Error bars indicate the standard  
44 deviation of 1000 bootstrap samples.

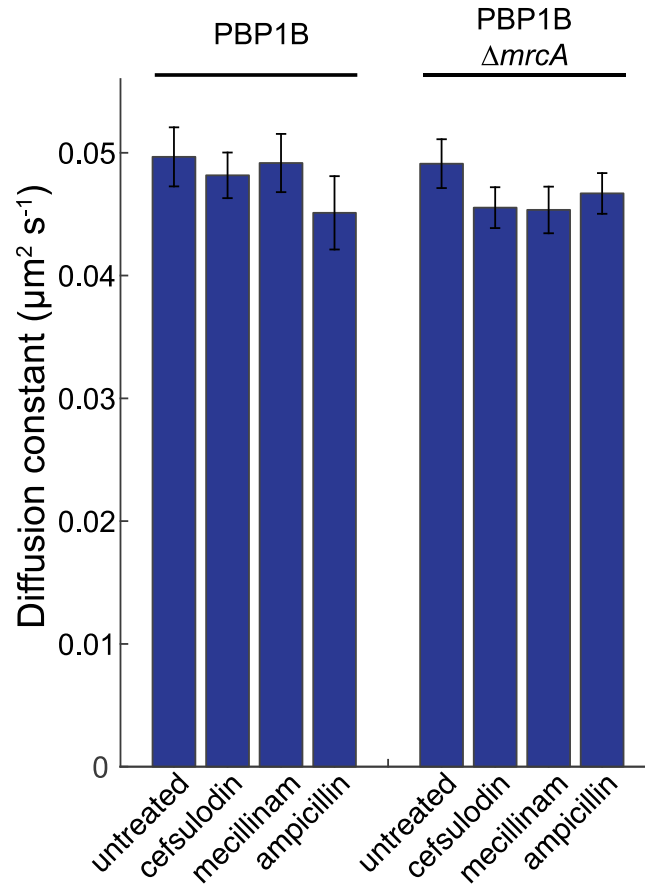

45

46 **Supplementary Figure 6** PBP1B dynamics are not affected by antibiotics during  
 47 cell elongation. Apparent diffusion constants of PAmCherry-PBP1B molecules  
 48 (TKL211) or PAmCherry-PBP1A in a  $\Delta mrcA$  background (TKL250); cells were  
 49 imaged on agarose pads containing  $\beta$ -lactam antibiotics ( $100 \mu\text{g ml}^{-1}$  each). Error  
 50 bars indicate the standard deviation of 1000 bootstrap samples.

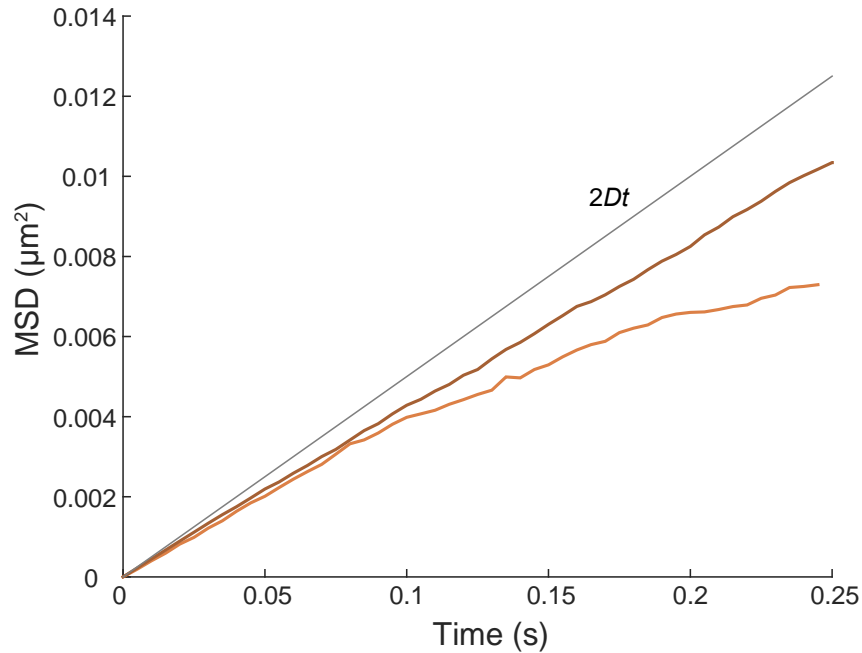

51

52 **Supplementary Figure 7** Quantification of the effects of the curvature of the cell  
 53 and of having a slow-moving subpopulation of molecules on MSD. To simplify  
 54 interpretation, we consider only one-dimensional motion. Gray line shows the  
 55 expected MSD for molecules with a diffusion constant  $D = 0.025 \mu\text{m}^2/\text{s}$ . The dark  
 56 orange line shows the effects of cell curvature within the TIRF field. Shown is the  
 57 MSD projected onto the plane from a Monte Carlo simulation of 20,000 molecules  
 58 diffusing in the circumferential direction with  $D = 0.025 \mu\text{m}^2/\text{s}$  along a cylindrical  
 59 surface in which only the duration of tracks that remained in the TIRF field (defined  
 60 as  $0.1 \mu\text{m}$  from the bottom of the cell) were used to compute the MSD. The projected  
 61 TIRF MSD is expected to plateau at  $0.032 \mu\text{m}^2$ . The bright orange line shows the  
 62 projected MSD in a Monte Carlo simulation in which molecules switched randomly  
 63 between a fast-diffusion state with  $D = 0.05 \mu\text{m}^2/\text{s}$  and a static state with  $D = 0$   
 64  $\mu\text{m}^2/\text{s}$ , representing a fast-moving fraction of  $\alpha = 0.5$ . The MSD starts to plateau  
 65 because slow-moving molecules are enriched in the population of long TIRF tracks;



66 fast-moving molecules are more likely to move out of the TIRF field, thereby  
67 terminating their tracks. Monte Carlo simulations were performed using a time step  
68 of  $dt = 5$  ms and a grid spacing of 31 nm.

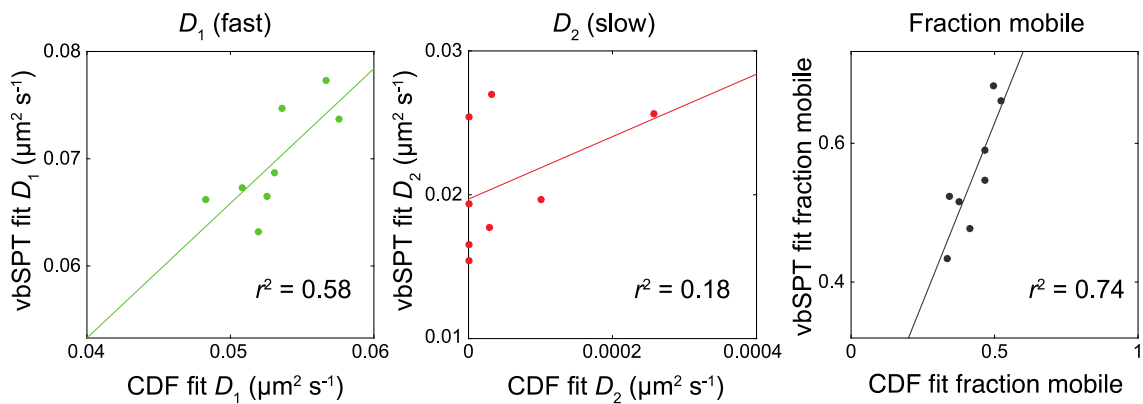

69

70 **Supplementary Figure 8** Comparison of diffusion constant estimates and fractions

71 of mobile molecules from fitting cumulative distribution functions versus using the

72 variational Bayes single-particle tracking (vbSPT) package. Each point represents a

73 condition as presented in Tables S1 and S2, and each line is the best fit to the data.

74 vbSPT returned the best global model as having two states for all conditions listed,

75 where the maximum number of conditions considered was limited to five.

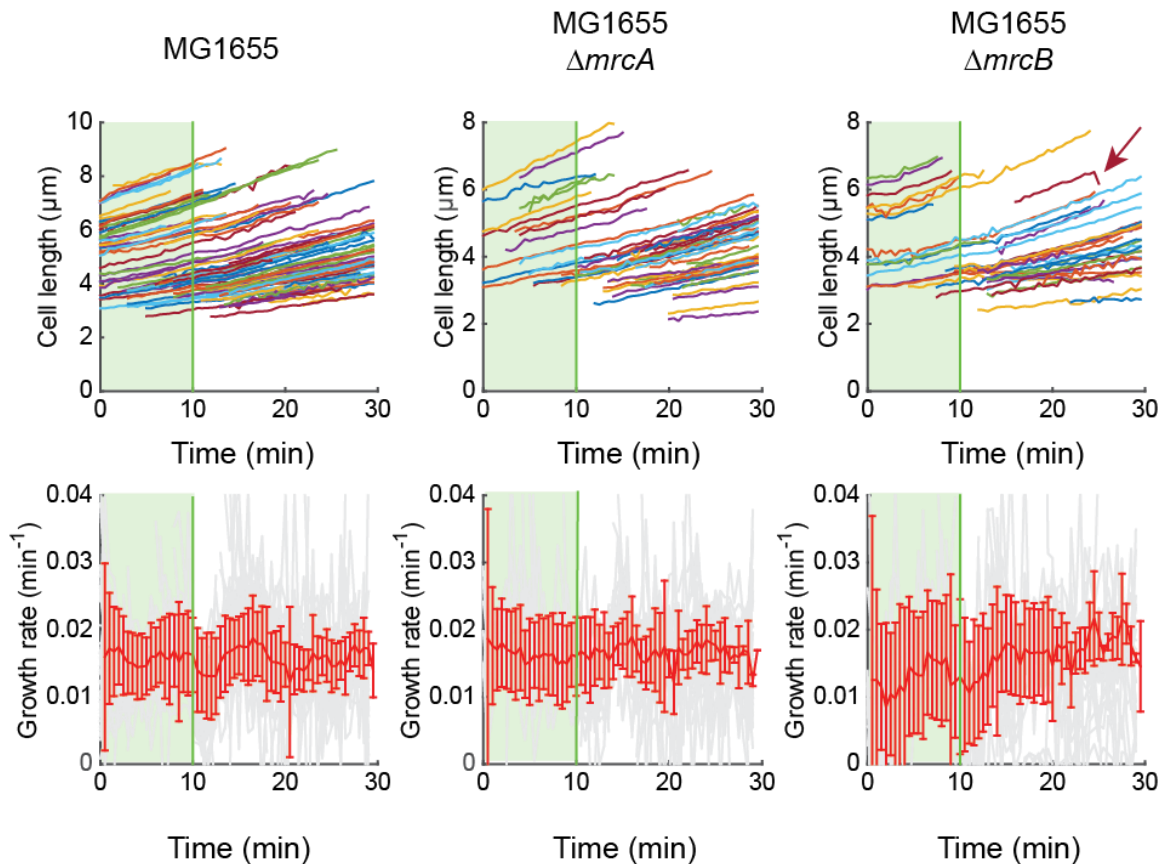

76

77 **Supplementary Figure 9** *E. coli* growth rate during elongation is not affected by  
 78 cefsulodin. *E. coli* cells were loaded into a CellASIC microfluidic device and growth  
 79 was observed over 1 h in EZ-RDM + 0.2% glucose at 30 °C. From  $t = 0$  to 10 min, cells  
 80 elongated at a constant rate in medium without cefsulodin. At 10 min (green vertical  
 81 line), the flow of medium was switched to include 100  $\mu\text{g ml}^{-1}$  cefsulodin.  
 82 Exponential growth rate (bottom) was calculated from the change in cell length  
 83 (top) for single cells. Cells whose tracking initiates after  $t = 0$  are predominantly  
 84 daughter cells that appear due to a division event, with occasional cells coming into  
 85 the imaging frame due to flow.  
 86 The  $\Delta mrcB$  cell (red arrow) that shows a marked decrease in length in the final  
 87 frame tracked was verified to be in the process of lysing. Single grey lines indicate

88 growth rates for individual cells, red lines indicate the average ( $n \geq 3$ ) growth at  
89 each time point, and error bars represent standard deviation.

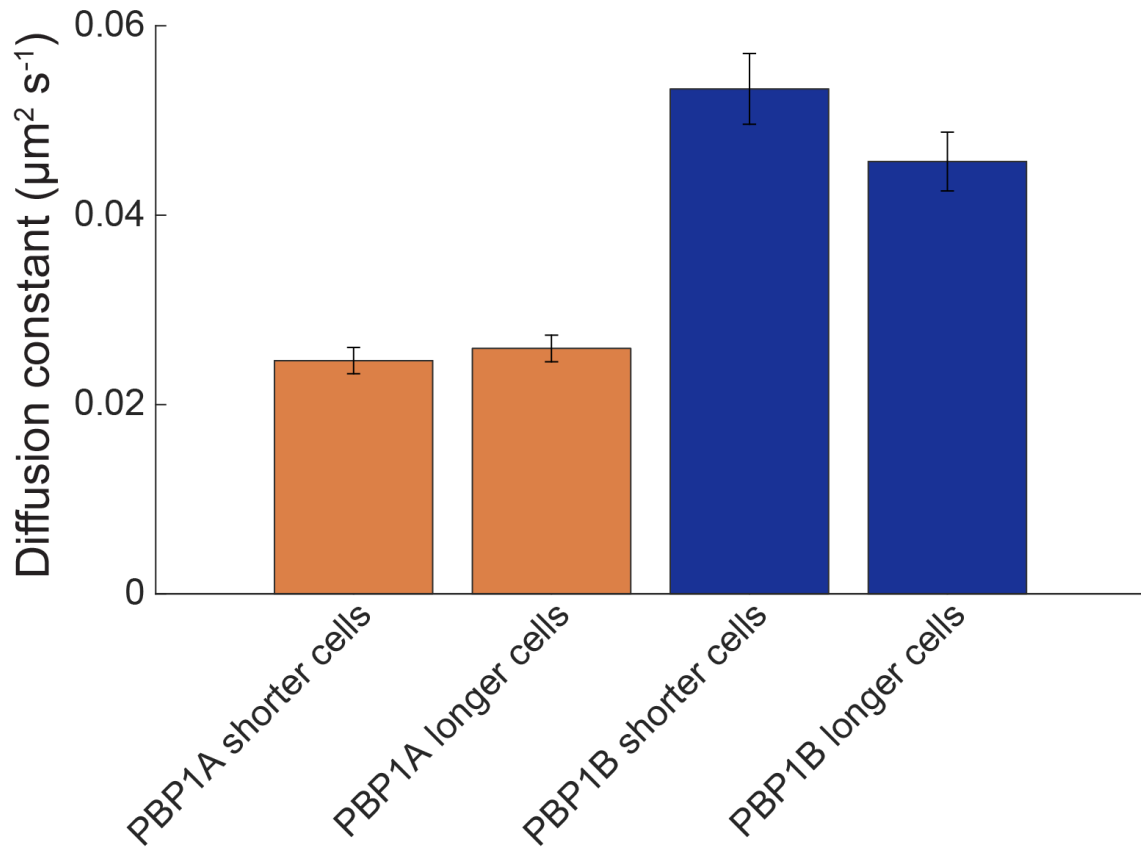

90

91 **Supplementary Figure 10** The apparent diffusion constant for untreated cells in  
 92 wild-type backgrounds (TKL241 for PBP1A and TKL211 for PBP1B) presented in  
 93 Figure 1c was re-analysed by partitioning cells into groups above or below the  
 94 median cell length (4.2 μm for TKL241 and 4.6 μm for TKL211). Error bars indicate  
 95 the standard deviation of 1000 bootstrap samples. The difference between PBP1A  
 96 cell lengths is not significant ( $p = 0.46$ ), while there may be a significant difference in  
 97 PBP1B mobility as a function of cell length ( $p = 0.05$ ).

98 **Supplementary Tables**

99

100 **Supplementary Table 1** Step-size cumulative probability distribution fitting

101 results.

| <b>Condition</b>              | <b><math>D_1</math> (<math>\mu\text{m}^2 \text{s}^{-1}</math>)</b> | <b><math>D_2</math> (<math>\mu\text{m}^2 \text{s}^{-1}</math>)</b> | <b><math>\alpha</math> (fraction)</b> | <b><math>\sigma</math> (<math>\mu\text{m}</math>)</b> |
|-------------------------------|--------------------------------------------------------------------|--------------------------------------------------------------------|---------------------------------------|-------------------------------------------------------|
| <b>untreated</b>              | 0.051 $\pm$ 0.0012                                                 | 7.3e-12 $\pm$ 1.4e-11                                              | 0.50 $\pm$ 0.012                      | 0.029 $\pm$ 0.00032                                   |
| <b>cefsulodin</b>             | 0.052 $\pm$ 0.0021                                                 | 3.6e-12 $\pm$ 7e-12                                                | 0.34 $\pm$ 0.014                      | 0.025 $\pm$ 0.00037                                   |
| <b>mecillinam</b>             | 0.057 $\pm$ 0.0025                                                 | 3.2e-5 $\pm$ 1e-4                                                  | 0.47 $\pm$ 0.024                      | 0.029 $\pm$ 0.00054                                   |
| <b>ampicillin</b>             | 0.048 $\pm$ 0.0013                                                 | 2.9e-5 $\pm$ 8.7e-5                                                | 0.52 $\pm$ 0.014                      | 0.026 $\pm$ 0.00039                                   |
| <b>cefsulodin+mecillinam</b>  | 0.058 $\pm$ 0.0041                                                 | 6.4e-7 $\pm$ 1.2e-5                                                | 0.33 $\pm$ 0.026                      | 0.028 $\pm$ 0.00057                                   |
| <b>ampicillin+cefsulodin</b>  | 0.053 $\pm$ 0.0022                                                 | 1.4e-7 $\pm$ 3.5e-6                                                | 0.38 $\pm$ 0.015                      | 0.024 $\pm$ 0.00040                                   |
| <b>cefmetazole</b>            | 0.053 $\pm$ 0.0018                                                 | 1e-4 $\pm$ 1.5e-5                                                  | 0.47 $\pm$ 0.016                      | 0.026 $\pm$ 0.00046                                   |
| <b>cefmetazole+mecillinam</b> | 0.054 $\pm$ 0.0029                                                 | 2.6e-4 $\pm$ 2.7e-4                                                | 0.41 $\pm$ 0.023                      | 0.027 $\pm$ 0.00065                                   |

102

103 **Supplementary Table 2** Diffusion parameters estimated from vbSPT.

| <b>Condition</b>              | <b><math>D_1</math> (<math>\mu\text{m}^2 \text{s}^{-1}</math>)</b> | <b><math>D_2</math> (<math>\mu\text{m}^2 \text{s}^{-1}</math>)</b> | <b><math>\alpha</math> (fraction)</b> |
|-------------------------------|--------------------------------------------------------------------|--------------------------------------------------------------------|---------------------------------------|
| <b>untreated</b>              | 0.0673                                                             | 0.0194                                                             | 0.683                                 |
| <b>cefsulodin</b>             | 0.0632                                                             | 0.0165                                                             | 0.524                                 |
| <b>mecillinam</b>             | 0.0773                                                             | 0.027                                                              | 0.547                                 |
| <b>ampicillin</b>             | 0.0662                                                             | 0.0177                                                             | 0.661                                 |
| <b>cefsulodin+mecillinam</b>  | 0.0737                                                             | 0.0254                                                             | 0.434                                 |
| <b>ampicillin+cefsulodin</b>  | 0.0665                                                             | 0.0154                                                             | 0.515                                 |
| <b>cefmetazole</b>            | 0.0687                                                             | 0.0197                                                             | 0.59                                  |
| <b>cefmetazole+mecillinam</b> | 0.0747                                                             | 0.0256                                                             | 0.477                                 |

104

105 **Supplementary Table 3** Strains used in this study. Note that *yrfD* is nearby *mrcA*  
 106 and hence was used to move the PAmCherry-PBP1A construct between strains  
 107 using P1 transduction or Lamba-Red recombination.

| Strain         | Description                                                                                                                         | Ref/source               |
|----------------|-------------------------------------------------------------------------------------------------------------------------------------|--------------------------|
| <b>MG1655</b>  | <i>Escherichia coli</i> K-12 wildtype                                                                                               | CGSC #6300               |
| <b>CS109</b>   | W1485 <i>glnV rpoS rph</i>                                                                                                          | 1                        |
| <b>CS612-1</b> | CS109 $\Delta$ <i>dacB</i> $\Delta$ <i>dacA</i> $\Delta$ <i>dacC</i> $\Delta$ <i>pbpG</i> $\Delta$ <i>ampC</i> $\Delta$ <i>ampH</i> | 1                        |
| <b>TKL130</b>  | MG1655 <i>mrda::PAmCherry-mrda</i>                                                                                                  | 2                        |
| <b>TKL238</b>  | MG1655 $\Delta$ <i>mrcB::frt</i> pKD46                                                                                              | This study, <sup>3</sup> |
| <b>TKL240</b>  | MG1655 $\Delta$ <i>mrcB::frt</i> $\Delta$ <i>yrfD::kan</i> <i>PAmCherry-mrcA</i>                                                    | This study               |
| <b>TKL241</b>  | MG1655 $\Delta$ <i>yrfD::frt</i> <i>PAmCherry-mrcA</i>                                                                              | This study               |
| <b>TKL242</b>  | MG1655 $\Delta$ <i>yrfD::frt</i> <i>PAmCherry-mrcA</i> $\Delta$ <i>lpoA::kan</i>                                                    | This study               |
| <b>TKL258</b>  | CS109 $\Delta$ <i>yrfD::kan</i> <i>PAmCherry-mrcA</i>                                                                               | This study               |
| <b>TKL259</b>  | CS612 $\Delta$ <i>yrfD::kan</i> <i>PAmCherry-mrcA</i>                                                                               | This study               |
| <b>TKL211</b>  | MG1655 <i>PAmCherry-mrcB</i>                                                                                                        | This study               |
| <b>TKL239</b>  | MG1655 $\Delta$ <i>mrcA::kan</i> <i>PAmCherry-mrcB</i>                                                                              | This study               |
| <b>TKL243</b>  | MG1655 <i>PAmCherry-mrcB</i> $\Delta$ <i>lpoB::kan</i>                                                                              | This study               |

108



109 **Supplementary Table 4** Plasmids used in this study.

| Plasmid                | Description                                          | Ref/source |
|------------------------|------------------------------------------------------|------------|
| <b>pRM102</b>          | pSC101 ori, cat, rrnB T1, MCS, tL3, CmR              | 4          |
| <b>pDS132</b>          | R6K ori, sacB, MCS, cat, CmR                         | 5          |
| <b>pJ401-PAmCherry</b> | PAmCherry codon optimised for <i>E. coli</i> , KanR  | 2          |
| <b>pKD46</b>           | repA101(ts) araBp-gam-bet-exo oriR101 bla            | 3          |
| <b>pCP20</b>           | ts-rep [cI857]lambda(ts) bla cat FLP                 | 3          |
| <b>pKC175</b>          | pDS132 $P_{mrcB}$ -PAmCherry-mrcB                    | This study |
| <b>pKC178</b>          | pRM102 $\Delta yrfD::kan$ $P_{mrcA}$ -PAmCherry-mrcA | This study |

110

## 111 **Supplementary Methods**

112

### 113 ***Detailed Strain Construction***

114

115 TKL238 (Table S3) is a  $\Delta mrcB$  background used for Lambda-Red recombineering<sup>3</sup>.

116 The  $\Delta mrcB::kan$  allele was introduced into MG1655 through a P1 lysate made from

117 the corresponding strain in the KEIO deletion library<sup>6</sup>, and the kan cassette was

118 cured using pCP20 (Table S4). The resulting strain was then transformed with the

119 Lambda-Red helper plasmid pKD46.

120

121 pKC178 is a template for the PAmCherry-PBP1A fusion with a defined linker,

122 GHGTGSTGSGSS, that was later used for linker optimization to ensure functionality

123 of the fusion. Enzymatic assembly was performed with the four following

124 components: 1) the pRM102 vector amplified with primers 5'-

125 CAAGCTTGGCACTGGCCACG and 5'-AATGGCGATGACGCATCCTC, 2) the flanking

126 regions of the neutral deletion  $\Delta yrfD::kan$  from its corresponding KEIO deletion

127 strain amplified with primers 5'-

128 GCCTTTTTGCGTGGCCAGTGCCAAGCTTGTCAGTACGCCTTCCCAAGCGC and 5'-

129 CACTGGAAATTTCCATTTAGTTTCATTTG, 3) the codon-optimized PAmCherry

130 sequence from TKL130 amplified with primers 5'-

131 CTGCCCAAATGAAACTAAATGGGAAATTTCCAGTGGTAAGCAAGGGCGAAGAGGACAAC

132 A and 5'-

133 TGCAACAGACTGCAAGGATCAAAAAATACTTTACGAACTTTGAGCTGCCGCTGCCGGTGC

134 , and 4) the *mrcA* sequence from MG1655 amplified with primers 5'-  
135 AAGTTCGTAAAGTATTTTTTGGATCCTTG and 5'-  
136 CCCGGATATTATCGTGAGGATGCGTCATCGCCATTTTTATCAGGCTTATGGGGTTTCTGC.

137

138 TKL240 contains a chromosomally integrated PAmCherry-PBP1A construct with the  
139 optimized linker RGNQHPQN, which was generated through the following process.

140 First, a PCR fragment was prepared containing  $\Delta yrfD::kan$ , the *mrcA* promoter, and  
141 PAmCherry from pKC178 using primer 5'-

142 CCAGGGCAAAAATTAATTGGCGGGTTCATCAGTACGCCTTCCCAAGCGC and a primer  
143 with degenerate bases corresponding to possible linker sequences, 5'-

144 CCCAGCAGAATGCAACAGACTGCAAGGATCAAAAATACTTTACGAACTTNNBNNBNNB  
145 NNBNNBNNBNNBNNBCTTGTACAACATCCATGCCACC. This fragment was  
146 introduced via Lambda-Red recombination into TKL238 and selected for kanamycin  
147 resistance. The resultant clones were further selected via microscopy for clones  
148 expressing PAmCherry-PBP1A.

149

150 TKL241 was derived from TKL240 by curing the kan resistance cassette using  
151 pCP20.

152

153 TKL242 was derived from TKL241 by introducing P1 lysate prepared from the  
154  $\Delta lpoA$  strain in the KEIO deletion library.

155

156 TKL258 was created by transducing CS109 with P1 lysate prepared from TKL240.

157

158 TKL259 was created by transducing CS612-1 with P1 lysate prepared from TKL240.

159

160 pKC175 was created via enzymatic assembly using the following PCR fragments: 1)

161 the pDS132 vector using primers 5'-AGCTCTCCCGGAATTCCAC and 5'-

162 AGCTCTCCCGGAATTCCAC, 2) the *mrcB* promoter from MG1655 using 5'-

163 GGCAGGTATATGTGATGGGTAAAAAGGATCGATCCTTTGGTTTTCTCCCTCTCCCTGTG

164 and 5'-CATCGGTTCTTCATCCTCATAGTCATCATA, 3) PAmCherry using 5'-

165 ACGATTATGATGACTATGAGGATGAAGAACCGATGGTAAGCAAGGGCGAAGAGGACAAC

166 A and 5'-

167 GAGGCTTACGCCCTTTGCCTTTGCCCTTACCTTTGCGCGGTGAGCTGCCGCTGCCGGTGC,

168 and 4) the *mrcB* coding sequence from MG1655 using 5'-

169 CCGCGCAAAGGTAAGGGCAAAGG and 5'-

170 CATCGGTTCTTCATCCTCATAGTCATCATAATCGTCGT.

171

172 TKL211 was created through allele exchange in MG1655 using the suicide plasmid

173 pKC175.

174

175 TKL239 was created through transduction of TKL211 using P1 lysate prepared from

176 the  $\Delta mrcA::kan$  strain of the KEIO deletion library.

177

178 TKL243 was created through transduction of TKL211 using P1 lysate prepared from

179 the  $\Delta lpoA::kan$  strain of the KEIO deletion library.

180 **Supplementary References**

181

- 182 1. Denome, S.A., Elf, P.K., Henderson, T.A., Nelson, D.E. & Young, K.D. Escherichia  
183 coli mutants lacking all possible combinations of eight penicillin binding  
184 proteins: viability, characteristics, and implications for peptidoglycan  
185 synthesis. *Journal of bacteriology* **181**, 3981-3993 (1999).
- 186 2. Lee, T.K. *et al.* A dynamically assembled cell wall synthesis machinery buffers  
187 cell growth. *Proceedings of the National Academy of Sciences of the United*  
188 *States of America* **111**, 4554-4559 (2014).
- 189 3. Datsenko, K.A. & Wanner, B.L. One-step inactivation of chromosomal genes in  
190 Escherichia coli K-12 using PCR products. *Proceedings of the National*  
191 *Academy of Sciences of the United States of America* **97**, 6640-6645 (2000).
- 192 4. Quan, S. *et al.* Adaptive evolution of the lactose utilization network in  
193 experimentally evolved populations of Escherichia coli. *PLoS Genet.* **8**,  
194 e1002444 (2012).
- 195 5. Philippe, N., Alcaraz, J.P., Coursange, E., Geiselman, J. & Schneider, D.  
196 Improvement of pCVD442, a suicide plasmid for gene allele exchange in  
197 bacteria. *Plasmid* **51**, 246-255 (2004).
- 198 6. Baba, T. *et al.* Construction of Escherichia coli K-12 in-frame, single-gene  
199 knockout mutants: the Keio collection. *Molecular systems biology* **2**, 2006  
200 0008 (2006).

201
